# Supplementary material for: Organic matter cycling along geochemical, geomorphic and disturbance gradients in forests and cropland of the African Tropics – Project TropSOC Database Version 1.0
Source: Copernicus journal article supplement (doi:10.5194/essd-2021-73), 2021-04-23
Supplement: Supplementary file 3 [file 12_sample_identifier.pdf › TropSOC_DATABASE_v1.0/1_basic_information/12_sample_identifier.pdf]

## Organic matter cycling along geochemical, geomorphic and disturbance gradients in vegetation and soils of African tropical forests and cropland - Project TropSOC DATABASE\_v1.0

### 1.2 Basic Information – Data base internal connection between location of plots and points and soil data from different soil depths

When using these data, please cite the original publication:

Doetterl S., Asifiwe R.K., Baert G., Bamba F., Bauters M., Boeckx P., Bukombe B., Cadisch G., Cizungu L.N., Cooper M., Hoyt A., Kabaseke C., Kalbitz K., Kidinda L., Maier A., Mainka M., Mayrock J., Muhindo D., Mujinya B.B., Mukotanyi, S.M., Nabahungu L., Reichenbach M., Rewald B., Six J., Stegmann A., Summerauer L., Unseld R., Vanlauwe B., Van Oost K., Verheyen K. Vogel C., Wilken F., Fiener P. Organic matter cycling along geochemical, geomorphic and disturbance gradients in forests and cropland of the African Tropics - Project TropSOC Database Version 1.0. *Earth System Science Data* XXX, DOI XXX, 2021.

#### Introduction

This data table comprises a unique plot and point identifier. This identifier allows to link the results from sample analysis with the locations given in *11\_plots\_points.csv*. This results in a n:1 connection between *12\_sample\_identifier.csv* and *11\_plots\_points.csv*. The data table further comprises four variables that provide information on sample type and depth of sampled increments.

#### Data structure

| No. | Variable        | Explanation                                                                                                                                                                                            | Unit |
|-----|-----------------|--------------------------------------------------------------------------------------------------------------------------------------------------------------------------------------------------------|------|
| 1   | plotID          | unique identifier of each plot and point where data were collected                                                                                                                                     | -    |
| 2   | sampleID        | unique identifier of any soil or vegetation sample taken in the field                                                                                                                                  | -    |
| 3   | sample_type     | sample types, subdivided into: mineral soil layers = MS, organic soil layers form a L horizon = OS_L, organic soil layers from an O-horizon = OS_O, parent material' = RO, and vegetation = VE samples | -    |
| 4   | u_depths        | upper boundary of sample depth increment                                                                                                                                                               | cm   |
| 5   | l_depths        | lower boundary of sample depth increment                                                                                                                                                               | cm   |
| 6   | increment_depth | depth range represented by sample (= l_depths - u_depths)                                                                                                                                              | cm   |

#### Acknowledgment

TropSOC was funded via the Emmy-Noether-Program of the German Research Foundation (project ID 387472333).
