# Supplementary material for: Organic matter cycling along geochemical, geomorphic and disturbance gradients in forests and cropland of the African Tropics – Project TropSOC Database Version 1.0
Source: Copernicus journal article supplement (doi:10.5194/essd-2021-73), 2021-04-23
Supplement: Supplementary file 4 [file 1_basic_information.pdf › TropSOC_DATABASE_v1.0/1_basic_information/1_basic_information.pdf]

## **Organic matter cycling along geochemical, geomorphic and disturbance gradients in vegetation and soils of African tropical forests and cropland - Project TropSOC DATABASE\_v1.0**

### **1. Basic Information - overview**

When using these data, please cite the original publication:

Doetterl S., Asifiwe R.K., Baert G., Bamba F., Bauters M., Boeckx P., Bukombe B., Cadisch G., Cizungu L.N., Cooper M., Hoyt A., Kabaseke C., Kalbitz K., Kidinda L., Maier A., Mainka M., Mayrock J., Muhindo D., Mujinya B.B., Mukotanyi, S.M., Nabahungu L., Reichenbach M., Rewald B., Six J., Stegmann A., Summerauer L., Unseld R., Vanlauwe B., Van Oost K., Verheyen K. Vogel C., Wilken F., Fiener P. Organic matter cycling along geochemical, geomorphic and disturbance gradients in forests and cropland of the African Tropics - Project TropSOC Database Version 1.0. *Earth System Science Data* XXX, DOI XXX, 2021.

### **Description**

The basic information of the database is structured in the following way:

Part 1 – Location and basic background information for all plots and points where data were collected. Data can be found in file *11\_plots\_points.csv*, with description given in *11\_plots\_points.pdf*.

Part 2 – Sample identifier for the data base' internal connection between location of plots, points and soil data from different soils depths as well as vegetation data. Data is stored in *12\_sample\_identifier.csv*, with description given in *12\_sample\_identifier.pdf*.
