# Supplementary material for: Organic matter cycling along geochemical, geomorphic and disturbance gradients in forests and cropland of the African Tropics – Project TropSOC Database Version 1.0
Source: Copernicus journal article supplement (doi:10.5194/essd-2021-73), 2021-04-23
Supplement: Supplementary file 6 [file 2111_root_prod.pdf › TropSOC_DATABASE_v1.0/2_forest/2111_root_prod.pdf]

## Organic matter cycling along geochemical, geomorphic and disturbance gradients in vegetation and soils of African tropical forests and cropland - Project TropSOC DATABASE\_v1.0

### 2.1.11. Forest – Vegetation – Root productivity

When using these data, please cite the original publication:

Doetterl S., Asifiwe R.K., Baert G., Bamba F., Bauters M., Boeckx P., Bukombe B., Cadisch G., Cizungu L.N., Cooper M., Hoyt A., Kabaseke C., Kalbitz K., Kidinda L., Maier A., Mainka M., Mayrock J., Muhindo D., Mujinya B.B., Mukotanyi, S.M., Nabahungu L., Reichenbach M., Rewald B., Six J., Stegmann A., Summerauer L., Unseld R., Vanlauwe B., Van Oost K., Verheyen K. Vogel C., Wilken F., Fiener P. Organic matter cycling along geochemical, geomorphic and disturbance gradients in forests and cropland of the African Tropics - Project TropSOC Database Version 1.0. *Earth System Science Data* XXX, DOI XXX, 2021.

#### Introduction

The dataset comprises a unique plot identifier and a subplot ID followed by 6 variables that provide data regarding root productivity at the plot and subplot level for TropSOC's forest plots. Missing values are indicated by -9999.

#### Data structure

| No. | Variable  | Explanation                                                        | Unit                                |
|-----|-----------|--------------------------------------------------------------------|-------------------------------------|
| 1   | plotID    | unique identifier of each plot and point where data were collected | -                                   |
| 2   | subplotID | alphabetic letter representing each subplot within a plot          | -                                   |
| 3   | instal    | installation date of ingrowth nets                                 | dd.mm.yyyy                          |
| 4   | harvest   | harvest date of ingrowth nets                                      | dd.mm.yyyy                          |
| 5   | interval  | period and length for root growth in each net                      | dd                                  |
| 6   | root_bm_1 | fine root (< 2 mm) production                                      | g m <sup>-2</sup>                   |
| 7   | root_bm_2 | fine root (< 2 mm) production                                      | g m <sup>-2</sup> day <sup>-1</sup> |
| 8   | comment   | specific comments                                                  |                                     |

#### Methods

Fine root net primary productivity was assessed using the ingrowth net method following Ohashi et al. (2016). Two net sheets (mesh Ø 2 mm and net size 20 x 10 cm) were installed per subplot in a regular pattern with a distance of approximately 1 m between the two nets (for details regarding plots and plot design see *2\_forest.pdf*). Each net was vertically inserted in the top 20 cm of soil starting from the surface of the mineral soil layer. Nets were sampled every three months after installation and seasonally four times a year, from September 2018 to December 2019. Data is provided as g m<sup>-2</sup> and g m<sup>-2</sup> day<sup>-1</sup> of total fine root production per plot for each assessment period. Nets were removed from soil by first making slits of 3cm on both sides of the net using a spade. Next, a 10 cm wide, 6 cm thick and 20 cm deep soil block was collected with the individual net inside of the block. The two nets from each subplot were then packed into polyethylene plastic bags. In each subplot, harvested nets were replaced with new ones for the next season in an undisturbed area of soil as close as possible to the previous net positions. In the laboratory, we carefully removed soil surrounding the nets using a wooden brush to avoid damage to roots. Fine roots (< 2 mm) that had grown through the net sheets were collected and carefully washed to remove any remaining soil material, oven-dried at 70 °C for 72

hours and weighed (dry weight). Finally, all root biomass collected through this approach was stored for further chemical analyses and aggregated at the plot level, keeping seasons separated.

### ***Acknowledgment***

TropSOC was funded via the Emmy-Noether-Program of the German Research Foundation (project ID 387472333).

### ***References***

Ohashi, M., Nakano, A., Hirano, Y., Noguchi, K., Ikeno, H., Fukae, R., Yamase, K., Makita, N., and Finer, L.: Applicability of the net sheet method for estimating fine root production in forest ecosystems. *Trees Struct. Funct.*, 30, 571–578, 2016.
