# Supplementary material for: Organic matter cycling along geochemical, geomorphic and disturbance gradients in forests and cropland of the African Tropics – Project TropSOC Database Version 1.0
Source: Copernicus journal article supplement (doi:10.5194/essd-2021-73), 2021-04-23
Supplement: Supplementary file 8 [file 2113_root_prod_annual.pdf › TropSOC_DATABASE_v1.0/2_forest/2113_root_prod_annual.pdf]

## Organic matter cycling along geochemical, geomorphic and disturbance gradients in vegetation and soils of African tropical forests and cropland - Project TropSOC DATABASE\_v1.0

### 2.1.13. Forest – Vegetation – Root productivity aggregated to annual values

When using these data, please cite the original publication:

Doetterl S., Asifiwe R.K., Baert G., Bamba F., Bauters M., Boeckx P., Bukombe B., Cadisch G., Cizungu L.N., Cooper M., Hoyt A., Kabaseke C., Kalbitz K., Kidinda L., Maier A., Mainka M., Mayrock J., Muhindo D., Mujinya B.B., Mukotanyi, S.M., Nabahungu L., Reichenbach M., Rewald B., Six J., Stegmann A., Summerauer L., Unseld R., Van-lauwe B., Van Oost K., Verheyen K. Vogel C., Wilken F., Fiener P. Organic matter cycling along geochemical, geomorphic and disturbance gradients in forests and cropland of the African Tropics - Project TropSOC Database Version 1.0. *Earth System Science Data* XXX, DOI XXX, 2021.

#### Introduction

The dataset comprises a unique plot identifier, followed by 6 variables that provide data regarding root productivity aggregated for annual values at the plot level for TropSOC's forest plots. Missing values are indicated by -9999.

#### Data structure

| No. | Variable | Explanation                                                        | Unit                                   |
|-----|----------|--------------------------------------------------------------------|----------------------------------------|
| 1   | plotID   |                                                                    | -                                      |
| 2   | min_bio  | minimum fine root (< 2 mm) biomass productivity                    | kg ha <sup>-1</sup> day <sup>-1</sup>  |
| 3   | max_bio  | maximum fine root (< 2 mm) biomass productivity                    | kg ha <sup>-1</sup> day <sup>-1</sup>  |
| 4   | mean_bio | mean fine root (< 2 mm) biomass productivity                       | kg ha <sup>-1</sup> day <sup>-1</sup>  |
| 5   | sd_bio   | standard deviation of mean fine root (< 2 mm) biomass productivity | kg ha <sup>-1</sup> day <sup>-1</sup>  |
| 6   | sum_bio  | sum of fine root (< 2 mm) biomass productivity                     | kg ha <sup>-1</sup> year <sup>-1</sup> |
| 7   | no       | total number of observations considered in the calculations        | -                                      |

#### Methods

This dataset comprises an annual aggregation at the plot level of the root productivity data (2111\_root\_prod.csv) described in detail in 2111\_root\_prod.pdf.

#### Acknowledgment

TropSOC was funded via the Emmy-Noether-Program of the German Research Foundation (project ID 387472333).
