# Supplementary material for: Organic matter cycling along geochemical, geomorphic and disturbance gradients in forests and cropland of the African Tropics – Project TropSOC Database Version 1.0
Source: Copernicus journal article supplement (doi:10.5194/essd-2021-73), 2021-04-23
Supplement: Supplementary file 10 [file 212_forest_invent_agg.pdf › TropSOC_DATABASE_v1.0/2_forest/212_forest_invent_agg.pdf]

## Organic matter cycling along geochemical, geomorphic and disturbance gradients in vegetation and soils of African tropical forests and cropland - Project TropSOC DATABASE\_v1.0

### 2.1.2. Forest – Vegetation – Forest inventory aggregated

When using these data, please cite the original publication:

Doetterl S., Asifiwe R.K., Baert G., Bamba F., Bauters M., Boeckx P., Bukombe B., Cadisch G., Cizungu L.N., Cooper M., Hoyt A., Kabaseke C., Kalbitz K., Kidinda L., Maier A., Mainka M., Mayrock J., Muhindo D., Mujinya B.B., Mukotanyi, S.M., Nabahungu L., Reichenbach M., Rewald B., Six J., Stegmann A., Summerauer L., Unseld R., Vanlauwe B., Van Oost K., Verheyen K. Vogel C., Wilken F., Fiener P. Organic matter cycling along geochemical, geomorphic and disturbance gradients in forests and cropland of the African Tropics - Project TropSOC Database Version 1.0. *Earth System Science Data* XXX, DOI XXX, 2021.

#### Introduction

The data set comprises a unique plot identifier and 15 aggregated variables that describe forest vegetation properties based on two forest inventories carried out in 2018/19 and 2020. Missing values are indicated by -9999.

#### Data structure

| No. | Variable     | Explanation                                                                                                             | Unit                                 |
|-----|--------------|-------------------------------------------------------------------------------------------------------------------------|--------------------------------------|
| 1   | plotID       | unique identifier of each plot and point where data were collected                                                      | -                                    |
| 2   | mean_dbh18   | plot mean stem diameter at breast height 2018                                                                           | cm                                   |
| 3   | sd_dbh18     | standard deviation of plot mean stem diameter at breast height 2018                                                     | cm                                   |
| 4   | mean_dbh20   | plot mean stem diameter at breast height 2020                                                                           | cm                                   |
| 5   | sd_dbh20     | standard deviation of plot mean stem diameter at breast height 2020                                                     | cm                                   |
| 6   | avg_treeH18  | predicted mean tree height per plot for 2018                                                                            | m                                    |
| 7   | sd_treeH18   | standard deviation of predicted mean tree height per plot for 2018                                                      | m                                    |
| 8   | agb18        | above-ground biomass per unit area per plot for 2018; calculated as the sum of the biomass of a plot's individual trees | mg ha <sup>-1</sup>                  |
| 9   | agc18        | above-ground carbon stock per unit area per plot for 2018; assumed to be 50% of the total biomass                       | mg ha <sup>-1</sup>                  |
| 10  | agb20        | above-ground biomass per unit area per plot for 2020; calculated as the sum of the biomass of a plot's individual trees | mg ha <sup>-1</sup>                  |
| 11  | agc20        | above-ground carbon stock per unit area per plot for 2020; assumed to be 50% of the total biomass                       | mg ha <sup>-1</sup>                  |
| 12  | period       | Monitoring period (time between forest inventories). 1 = 12 months; 2 = 24 months; 2.3 = 28 months.                     | yr                                   |
| 13  | productivity | annual biomass productivity per unit area and time                                                                      | mg ha <sup>-1</sup> yr <sup>-1</sup> |
| 14  | stems18      | number of living stems per plot in 2018                                                                                 | -                                    |
| 15  | stems20      | number of living stems per plot in 2020                                                                                 | -                                    |
| 16  | lambda       | mortality rate                                                                                                          | %                                    |

### **Methods**

This aggregated dataset is based on two conducted forest inventories done in 2018/19 and 2020 (*211\_forest\_invent.csv*). Details regarding this inventory are given in *211\_forest\_invent.pdf*. Aggregation is done at the plot level and for both forest inventories separately.

### **Acknowledgment**

TropSOC was funded via the Emmy-Noether-Program of the German Research Foundation (project ID 387472333).
