# Supplementary material for: Organic matter cycling along geochemical, geomorphic and disturbance gradients in forests and cropland of the African Tropics – Project TropSOC Database Version 1.0
Source: Copernicus journal article supplement (doi:10.5194/essd-2021-73), 2021-04-23
Supplement: Supplementary file 12 [file 214_fresh_leaves_agg.pdf › TropSOC_DATABASE_v1.0/2_forest/214_fresh_leaves_agg.pdf]

## Organic matter cycling along geochemical, geomorphic and disturbance gradients in vegetation and soils of African tropical forests and cropland - Project TropSOC DATABASE\_v1.0

### 2.1.4. Forest – Vegetation – Fresh leaves chemistry aggregated at species level

When using these data, please cite the original publication:

Doetterl S., Asifiwe R.K., Baert G., Bamba F., Bauters M., Boeckx P., Bukombe B., Cadisch G., Cizungu L.N., Cooper M., Hoyt A., Kabaseke C., Kalbitz K., Kidinda L., Maier A., Mainka M., Mayrock J., Muhindo D., Mujinya B.B., Mukotanyi, S.M., Nabahungu L., Reichenbach M., Rewald B., Six J., Stegmann A., Summerauer L., Unseld R., Vanlauwe B., Van Oost K., Verheyen K. Vogel C., Wilken F., Fiener P. Organic matter cycling along geochemical, geomorphic and disturbance gradients in forests and cropland of the African Tropics - Project TropSOC Database Version 1.0. *Earth System Science Data* XXX, DOI XXX, 2021.

#### Introduction

The dataset comprises a unique plot identifier and tree species names, followed by 22 variables that describe the chemical properties of living canopy leaves aggregated at the species level. Missing values are indicated by -9999.

#### Data structure

| No. | Variable | Explanation                                                        | Unit                |
|-----|----------|--------------------------------------------------------------------|---------------------|
| 1   | plotID   | unique identifier of each plot and point where data were collected | -                   |
| 2   | species  | species of tree                                                    | -                   |
| 3   | mean_N   | mean nitrogen in sampled fresh leaves                              | %                   |
| 4   | sd_N     | standard deviation of mean nitrogen in sampled fresh leaves        | %                   |
| 5   | mean_C   | mean carbon in sampled fresh leaves                                | %                   |
| 6   | sd_C     | standard deviation of mean carbon in sampled fresh leaves          | %                   |
| 7   | mean_Al  | mean aluminium in sampled fresh leaves                             | mg kg <sup>-1</sup> |
| 8   | sd_Al    | standard deviation of mean aluminium in sampled fresh leaves       | mg kg <sup>-1</sup> |
| 9   | mean_Ca  | mean calcium in sampled fresh leaves                               | mg kg <sup>-1</sup> |
| 10  | sd_Ca    | standard deviation of mean calcium in sampled fresh leaves         | mg kg <sup>-1</sup> |
| 11  | mean_Fe  | mean iron in sampled fresh leaves                                  | mg kg <sup>-1</sup> |
| 12  | sd_Fe    | standard deviation of mean iron in sampled fresh leaves            | mg kg <sup>-1</sup> |
| 13  | mean_K   | mean potassium in sampled fresh leaves                             | mg kg <sup>-1</sup> |
| 14  | sd_K     | standard deviation of mean potassium in sampled fresh leaves       | mg kg <sup>-1</sup> |
| 15  | mean_Mg  | mean magnesium in sampled fresh leaves                             | mg kg <sup>-1</sup> |
| 16  | sd_Mg    | standard deviation of mean magnesium in sampled fresh leaves       | mg kg <sup>-1</sup> |
| 17  | mean_Mn  | mean manganese in sampled fresh leaves                             | mg kg <sup>-1</sup> |
| 18  | sd_Mn    | standard deviation of mean manganese in sampled fresh leaves       | mg kg <sup>-1</sup> |
| 19  | mean_Na  | mean sodium in sampled fresh leaves                                | mg kg <sup>-1</sup> |
| 20  | sd_Na    | standard deviation of mean sodium in sampled fresh leaves          | mg kg <sup>-1</sup> |
| 21  | mean_P   | mean phosphorous in sampled fresh leaves                           | mg kg <sup>-1</sup> |
| 22  | sd_P     | standard deviation of mean phosphorous in sampled fresh leaves     | mg kg <sup>-1</sup> |
| 23  | mean_Si  | mean silicon in sampled fresh leaves                               | mg kg <sup>-1</sup> |
| 24  | sd_Si    | standard deviation of mean silicon in sampled fresh leaves         | mg kg <sup>-1</sup> |

### **Methods**

This aggregated dataset is based on the fresh leaf dataset with values for individual canopy leaves (213\_fresh\_leaves.csv). Details regarding the sampling and analysis are given in 213\_fresh\_leaves.pdf. The aggregation done for the presented canopy leaf data is done on the species level within each forest plot.

### **Acknowledgment**

TropSOC was funded via the Emmy-Noether-Program of the German Research Foundation (project ID 387472333).
