# Supplementary material for: Organic matter cycling along geochemical, geomorphic and disturbance gradients in forests and cropland of the African Tropics – Project TropSOC Database Version 1.0
Source: Copernicus journal article supplement (doi:10.5194/essd-2021-73), 2021-04-23
Supplement: Supplementary file 18 [file 221_soil_carbon.pdf › TropSOC_DATABASE_v1.0/2_forest/221_soil_carbon.pdf]

## Organic matter cycling along geochemical, geomorphic and disturbance gradients in vegetation and soils of African tropical forests and cropland - Project TropSOC DATABASE\_v1.0

### 2.2.1. Forest – Mineral Soil Layers – Soil carbon and nitrogen including organic matter fractions

When using these data, please cite the original publication:

Doetterl S., Asifiwe R.K., Baert G., Bamba F., Bauters M., Boeckx P., Bukombe B., Cadisch G., Cizungu L.N., Cooper M., Hoyt A., Kabaseke C., Kalbitz K., Kidinda L., Maier A., Mainka M., Mayrock J., Muhindo D., Mujinya B.B., Mukotanyi, S.M., Nabahungu L., Reichenbach M., Rewald B., Six J., Stegmann A., Summerauer L., Unseld R., Vanlauwe B., Van Oost K., Verheyen K. Vogel C., Wilken F., Fiener P. Organic matter cycling along geochemical, geomorphic and disturbance gradients in forests and cropland of the African Tropics - Project TropSOC Database Version 1.0. *Earth System Science Data* XXX, DOI XXX, 2021.

#### Introduction

The data set comprises a unique sample identifier and 36 variables that provide information on soil organic carbon (C) and organic nitrogen (N) content in bulk soil and different soil fractions for TropSOC's forest plots. Note that for about 20 % of these data per parameter, triplicates were measured to assess the analytical laboratory error. In these cases, the respective means from these three measurements are reported. For all other data the entered datapoint represents a single measurement. This is indicated in the data table by information on the number of measurements used to calculate the mean. Standard deviation (SD) is only stated when triplicates were measured. In all other cases the SD is set to -9999, indicating missing values. Additional information regarding physicochemical bulk soil and soil fraction properties can be found in [222\\_soil\\_phy\\_chem.csv/pdf](#). Radioisotope signatures of soil C can be found in [253\\_c14.csv/pdf](#). Details regarding plots and plot design are documented in [2\\_forest.pdf](#).

#### Data structure

| No. | Variable    | Explanation                                                                                                               | Unit |
|-----|-------------|---------------------------------------------------------------------------------------------------------------------------|------|
| 1   | sampleID    | unique identifier of any soil or vegetation sample taken in the field                                                     | -    |
| 2   | mean_N_bulk | mean nitrogen content of the bulk soil                                                                                    | wt % |
| 3   | no_N_bulk   | number of measurements available to calculate the mean nitrogen content of the bulk soil                                  | -    |
| 4   | sd_N_bulk   | standard deviation of the mean nitrogen content of the bulk soil                                                          | wt % |
| 5   | mean_N_cPOM | mean nitrogen content of the coarse particulate organic matter fraction                                                   | wt % |
| 6   | no_N_cPOM   | number of measurements available to calculate the mean nitrogen content of the coarse particulate organic matter fraction | -    |
| 7   | sd_N_cPOM   | standard deviation of the mean nitrogen content of the coarse particulate organic matter fraction                         | wt % |
| 8   | mean_N_m    | mean nitrogen content of the water-stable microaggregate fraction                                                         | wt % |
| 9   | no_N_m      | number of measurements available to calculate the mean nitrogen content of the water-stable microaggregate fraction       | -    |
| 10  | sd_N_m      | standard deviation of the mean nitrogen content of the water-stable microaggregate fraction                               | wt % |
| 11  | mean_N_s+c  | mean nitrogen content of the free silt and clay fraction                                                                  | wt % |
| 12  | no_N_s+c    | number of measurements available to calculate the mean nitrogen content of the free silt and clay fraction                | -    |

|    |                  |                                                                                                                                                                                                                     |      |
|----|------------------|---------------------------------------------------------------------------------------------------------------------------------------------------------------------------------------------------------------------|------|
| 13 | sd_N_s+c         | standard deviation of the mean nitrogen content of the free silt and clay fraction                                                                                                                                  | wt % |
| 14 | mean_C_bulk      | mean organic carbon content of the bulk soil                                                                                                                                                                        | wt % |
| 15 | no_C_bulk        | number of measurements available to calculate the mean organic carbon content of the bulk soil                                                                                                                      | -    |
| 16 | sd_C_bulk        | standard deviation of the mean organic carbon content of the bulk soil                                                                                                                                              | wt % |
| 17 | mean_C_cPOM      | mean organic carbon content of the coarse particulate organic matter fraction                                                                                                                                       | wt % |
| 18 | no_C_cPOM        | number of measurements available to calculate the mean organic carbon content of the coarse particulate organic matter fraction                                                                                     | -    |
| 19 | sd_C_cPOM        | standard deviation of the mean organic carbon content of the coarse particulate organic matter fraction                                                                                                             | wt % |
| 20 | mean_C_m         | mean organic carbon content of the water-stable microaggregate fraction                                                                                                                                             | wt % |
| 21 | no_C_m           | number of measurements available to calculate the mean organic carbon content of the water-stable microaggregate fraction                                                                                           | -    |
| 22 | sd_C_m           | standard deviation of the mean organic carbon content of the water-stable microaggregate fraction                                                                                                                   | wt % |
| 23 | mean_C_s+c       | mean organic carbon content of the free silt and clay fraction                                                                                                                                                      | wt % |
| 24 | no_C_s+c         | number of measurements available to calculate the mean organic carbon content of the free silt and clay fraction                                                                                                    | -    |
| 25 | sd_C_s+c         | standard deviation of the mean organic carbon content of the free silt and clay fraction                                                                                                                            | wt % |
| 26 | mean_weight_bulk | mean mass of the bulk soil sample before fractionation                                                                                                                                                              | g    |
| 27 | no_weight_bulk   | number of measurements available to calculate the mean mass of the bulk soil sample                                                                                                                                 | g    |
| 28 | sd_weight_bulk   | standard deviation of the mean mass of the bulk soil sample                                                                                                                                                         | g    |
| 29 | mean_weight_cPOM | mean soil mass of the coarse particulate organic matter fraction as part of the bulk soil before fractionation (note from variables 26, 29, 32 & 35 the proportion of the fractions in bulk soil can be calculated) | g    |
| 30 | no_weight_cPOM   | number of measurements available to calculate the mean mass of the coarse particulate organic matter fraction                                                                                                       | g    |
| 31 | sd_weight_cPOM   | standard deviation of the mean mass of the coarse particulate organic matter fraction                                                                                                                               | g    |
| 32 | mean_weight_m    | mean soil mass of the water-stable microaggregate fraction as part of the bulk soil before fractionation (note from variables 26, 29, 32 & 35 the proportion of the fractions in bulk soil can be calculated)       | g    |
| 33 | no_weight_m      | number of measurements available to calculate the mean mass of the water-stable microaggregate fraction                                                                                                             | g    |
| 34 | sd_weight_m      | standard deviation of the mean mass of the water-stable microaggregate fraction                                                                                                                                     | g    |
| 35 | mean_weight_s+c  | mean soil mass of the free silt and clay fraction as part of the bulk soil before fractionation (note from variables 26, 29, 32 & 35 the proportion of the fractions in bulk soil can be calculated)                | g    |
| 36 | no_weight_s+c    | number of measurements available to calculate the mean mass of the free silt and clay fraction                                                                                                                      | g    |
| 37 | sd_weight_s+c    | standard deviation of the mean mass of the free silt and clay fraction                                                                                                                                              | g    |

## Methods

**Organic carbon and nitrogen analyses:** Bulk C and N in bulk soil and soil fractions were measured using 1 g of ground samples, with a dry combustion analyser (Variomax CN, Elementar GmbH, Hanau, Germany) and a measuring range of 0.2 - 400 mg g<sup>-1</sup> soil (to determine the absolute C or N mass in a sample) and a reproducibility of < 0.5 % (relative deviation). Recovery rates exceeding 97 % and 91 % were obtained across all samples for the soil mass as well as C and N concentrations, respectively. None of the soil samples showed any reaction when treated with 10 % HCl and are therefore considered free of carbonates. Consequently, total soil CN content is interpreted as soil organic carbon (SOC) and soil organic nitrogen (SON) content. This interpretation is also applied to samples showing fossil organic C residues from sediment sources (Reichenbach et al. 2021).

**Soil fractionation:** A subsample of 80 g was fractionated for each soil and depth layer to derive functional C fractions. This procedure was based on a conceptual C fraction model method proposed by Steward et al. (2008) and modified following Doetterl et al. (2015). The scheme consists of a series of physical fractionation techniques applied in order to isolate C fractions, differentiated based on stabilization mechanisms (chemical, biochemical, and physical). The isolated fractions can also be associated with different turnover times and varying C stability. Using a microaggregate isolator, C was fractionated into coarse particulate organic matter C (CPOM, > 250 µm), water-stable microaggregate associated C (mAgg 250 – 53 µm), and non-aggregated, free silt and clay associated C (s+c, < 53 µm). Reproducibility and the analytical laboratory error was determined by executing about 20 % of all measurements and fractionations in triplicate. For a scientific interpretation of the results of this fractionation scheme see Reichenbach et al. (2021).

## Acknowledgment

TropSOC was funded via the Emmy-Noether-Program of the German Research Foundation (project ID 387472333).

## References

- Doetterl, S., Stevens, A., Six, J., Merckx, R., van Oost, K., Pinto, M. C., Casanova-Katny, A., Muñoz, C., Boudin, M., Zagal Venegas, E., and Boeckx, P.: Soil carbon storage controlled by interactions between geochemistry and climate, *Nat. Geosci.*, 8, 780–783, <https://doi.org/10.1038/ngeo2516>, 2015.
- Stewart, C. E., Plante, A. F., Paustian, K., Conant, R. T., and Six, J.: Soil carbon saturation: linking concept and measurable carbon pools, *Soil Biol. Biochem.*, 72, 379–392, <https://doi.org/10.2136/sssaj2007.0104>, 2008.
- Reichenbach, M., Fiener P., Garland, G., Griepentrog, M., Six, S., and Doetterl, S.: The role of geochemistry in organic carbon stabilization in tropical rainforest soils, *SOIL DISCUSSIONS* (in review)., 2021.
