# Supplementary material for: Organic matter cycling along geochemical, geomorphic and disturbance gradients in forests and cropland of the African Tropics – Project TropSOC Database Version 1.0
Source: Copernicus journal article supplement (doi:10.5194/essd-2021-73), 2021-04-23
Supplement: Supplementary file 19 [file 222_soil_phy_chem.pdf › TropSOC_DATABASE_v1.0/2_forest/222_soil_phy_chem.pdf]

## Organic matter cycling along geochemical, geomorphic and disturbance gradients in vegetation and soils of African tropical forests and cropland - Project TropSOC DATABASE\_v1.0

### 2.2.2. Forest – Mineral Soil Layers – Physicochemical soil properties from laboratory analyses

When using these data, please cite the original publication:

Doetterl S., Asifiwe R.K., Baert G., Bamba F., Bauters M., Boeckx P., Bukombe B., Cadisch G., Cizungu L.N., Cooper M., Hoyt A., Kabaseke C., Kalbitz K., Kidinda L., Maier A., Mainka M., Mayrock J., Muhindo D., Mujinya B.B., Mukotanyi, S.M., Nabahungu L., Reichenbach M., Rewald B., Six J., Stegmann A., Summerauer L., Unseld R., Vanlauwe B., Van Oost K., Verheyen K. Vogel C., Wilken F., Fiener P. Organic matter cycling along geochemical, geomorphic and disturbance gradients in forests and cropland of the African Tropics - Project TropSOC Database Version 1.0. *Earth System Science Data* XXX, DOI XXX, 2021.

#### Introduction

The dataset comprises a unique sample identifier and 192 additional soil variables derived from physical and chemical laboratory analyses for TropSOC's forest plots. Most data are given for three soil depths 0 - 10 cm, 30 - 40 cm, and 60 - 70 cm (partly 90 - 100 cm). For all other soil depths missing values are indicated by -9999. This data set is among the data sets providing the basis for the spectrometer calibration, resulting in a more comprehensive data set for 'all' soil depths. Data on most parameters for missing soil depth increments is provided using NIR-MIR spectroscopy (see 224\_soil\_spec.csv/pdf). Note: Details regarding plots and plot design can be found in 2\_forest.pdf.

#### Data structure

| No. | Variable        | Explanation                                                           | Unit                     |
|-----|-----------------|-----------------------------------------------------------------------|--------------------------|
| 1   | sampleID        | unique identifier of any soil or vegetation sample taken in the field | -                        |
| 2   | clay            | clay [ $<2\mu\text{m}$ ] fraction of fine soil [ $<2\text{mm}$ ]      | %                        |
| 3   | silt            | silt [ $2-53\mu\text{m}$ ] fraction of fine soil [ $<2\text{mm}$ ]    | %                        |
| 4   | sand            | sand [ $2000-53\mu\text{m}$ ] fraction of fine soil [ $<2\text{mm}$ ] | %                        |
| 5   | BD_m_soil       | bulk density of mineral soil layer                                    | $\text{g cm}^{-3}$       |
| 6   | WHC             | water holding capacity [ $\text{H}_2\text{O g} / \text{soil g}$ ]     | wt %                     |
| 7   | pH_KCl          | pH measured in 1 M KCl solution                                       | -                        |
| 8   | P_avail         | soil plant available phosphorus (Bray-P)                              | $\text{mg kg}^{-1}$      |
| 9   | exch_acidity_Al | exchangeable $\text{Al}^{3+}$ of ECEC                                 | $0.01 \text{ me g}^{-1}$ |
| 10  | exch_acidity_H  | exchangeable $\text{H}^{+}$ of ECEC                                   | $0.01 \text{ me g}^{-1}$ |
| 11  | exch_bases_Na   | exchangeable $\text{Na}^{2+}$ of ECEC                                 | $0.01 \text{ me g}^{-1}$ |
| 12  | exch_bases_K    | exchangeable $\text{K}^{+}$ of ECEC                                   | $0.01 \text{ me g}^{-1}$ |
| 13  | exch_bases_Ca   | exchangeable $\text{Ca}^{2+}$ of ECEC                                 | $0.01 \text{ me g}^{-1}$ |
| 14  | exch_bases_Mg   | exchangeable $\text{Mg}^{2+}$ of ECEC                                 | $0.01 \text{ me g}^{-1}$ |
| 15  | ECEC            | effective cation exchange capacity                                    | $0.01 \text{ me g}^{-1}$ |
| 16  | bases_in_ECEC   | base saturation of effective cation exchange capacity                 | %                        |
| 17  | CEC             | potential cation exchange capacity                                    | $0.01 \text{ me g}^{-1}$ |
| 18  | bases_in_CEC    | base saturation of potential cation exchange capacity                 | %                        |

|    |                     |                                                                                  |   |
|----|---------------------|----------------------------------------------------------------------------------|---|
| 19 | mean_Ca_bulk_ICPOES | mean Ca in mass percent of the bulk soil                                         | % |
| 20 | sd_Ca_bulk_ICPOES   | standard deviation of mean Ca in mass percent of the bulk soil                   | % |
| 21 | no_Ca_bulk_ICPOES   | number of measurements for mean Ca of the bulk soil                              | % |
| 22 | mean_Ca_agg_ICPOES  | mean Ca in mass percent of water-stable microaggregates                          | % |
| 23 | sd_Ca_agg_ICPOES    | standard deviation of mean Ca in mass percent of water-stable microaggregates    | % |
| 24 | no_Ca_agg_ICPOES    | number of measurements for mean Ca of water-stable microaggregates               | % |
| 25 | mean_Ca_s+c_ICPOES  | mean Ca in mass percent of the free silt and clay fraction                       | % |
| 26 | sd_Ca_s+c_ICPOES    | standard deviation of mean Ca in mass percent of the free silt and clay fraction | % |
| 27 | no_Ca_s+c_ICPOES    | number of measurements for mean Ca of the free silt and clay fraction            | % |
| 28 | mean_Cu_bulk_ICPOES | mean Cu in mass percent of bulk soil                                             | % |
| 29 | sd_Cu_bulk_ICPOES   | standard deviation of mean Cu in mass percent of the bulk soil                   | % |
| 30 | no_Cu_bulk_ICPOES   | number of measurements for mean Cu of the bulk soil                              | % |
| 31 | mean_Cu_agg_ICPOES  | mean Cu in mass percent of water-stable microaggregates                          | % |
| 32 | sd_Cu_agg_ICPOES    | standard deviation of mean Cu in mass percent of water-stable microaggregates    | % |
| 33 | no_Cu_agg_ICPOES    | number of measurements for mean Cu of water-stable microaggregates               | % |
| 34 | mean_Cu_s+c_ICPOES  | mean Cu in mass percent of the free silt and clay fraction                       | % |
| 35 | sd_Cu_s+c_ICPOES    | standard deviation of mean Cu in mass percent of the free silt and clay fraction | % |
| 36 | no_Cu_s+c_ICPOES    | number of measurements for mean Cu of the free silt and clay fraction            | % |
| 37 | mean_K_bulk_ICPOES  | mean K in mass percent of bulk soil                                              | % |
| 38 | sd_K_bulk_ICPOES    | standard deviation of mean K in mass percent of the bulk soil                    | % |
| 39 | no_K_bulk_ICPOES    | number of measurements for mean K of the bulk soil                               | % |
| 40 | mean_K_agg_ICPOES   | mean K in mass percent of water-stable microaggregates                           | % |
| 41 | sd_K_agg_ICPOES     | standard deviation of mean K in mass percent of water-stable microaggregates     | % |
| 42 | no_K_agg_ICPOES     | number of measurements for mean K of water stable soil aggregates                | % |
| 43 | mean_K_s+c_ICPOES   | mean K in mass percent of the free silt and clay fraction                        | % |
| 44 | sd_K_s+c_ICPOES     | standard deviation of mean K in mass percent of the free silt and clay fraction  | % |
| 45 | no_K_s+c_ICPOES     | number of measurements for mean K of the bulk soil                               | % |
| 46 | mean_Mg_bulk_ICPOES | mean Mg in mass percent of the bulk soil                                         | % |
| 47 | sd_Mg_bulk_ICPOES   | standard deviation of mean Mg in mass percent of the bulk soil                   | % |
| 48 | no_Mg_bulk_ICPOE    | number of measurements for mean Mg of the bulk soil                              | % |
| 49 | mean_Mg_agg_ICPOES  | mean Mg in mass percent of water-stable microaggregates                          | % |
| 50 | sd_Mg_agg_ICPOES    | standard deviation of mean Mg in mass percent of water-stable microaggregates    | % |

|    |                       |                                                                                  |   |
|----|-----------------------|----------------------------------------------------------------------------------|---|
| 51 | no_Mg_agg_ICPOES      | number of measurements for mean Mg of water-stable microaggregates               | % |
| 52 | mean_Mg_s+c_ICPOES    | mean Mg in mass percent of the free silt and clay fraction                       | % |
| 53 | sd_Mg_s+c_ICPOES      | standard deviation of mean Mg in mass percent of the free silt and clay fraction | % |
| 54 | no_Mg_s+c_ICPOES      | number of measurements for mean Mg of the free silt and clay fraction            | % |
| 55 | mean_Na_bulk_ICPOES   | mean Na in mass percent of the bulk soil                                         | % |
| 56 | sd_Na_bulk_ICPOES     | standard deviation of mean Na in mass percent of the bulk soil                   | % |
| 57 | no_Na_bulk_ICPOES     | number of measurements for mean Na of the bulk soil                              | % |
| 58 | mean_Na_agg_ICPOES    | mean Na in mass percent of water-stable microaggregates                          | % |
| 59 | sd_Na_agg_ICPOES      | standard deviation of mean Na in mass percent of water stable soil aggregates    | % |
| 60 | no_Na_agg_ICPOES      | number of measurements for mean Na of water-stable microaggregates               | % |
| 61 | mean_Na_s+c_ICPOES    | mean Na in mass percent of the free silt and clay fraction                       | % |
| 62 | sd_Na_s+c_ICPOES      | standard deviation of mean Na in mass percent of the free silt and clay fraction | % |
| 63 | no_Na_s+_ICPOES       | number of measurements for mean Na of the free silt and clay fraction            | % |
| 64 | mean_P_bulk_ICPOES    | mean P in mass percent of the bulk soil                                          | % |
| 65 | sd_P_bulk_ICPOES      | standard deviation of mean P in mass percent of the bulk soil                    | % |
| 66 | no_P_bulk_ICPOES      | number of measurements for mean P of the bulk soil                               | % |
| 67 | mean_P_agg_ICPOES     | mean P in mass percent of water-stable microaggregates                           | % |
| 68 | sd_P_agg_ICPOES       | standard deviation of mean P in mass percent of water-stable microaggregates     | % |
| 69 | no_P_agg_ICPOES       | number of measurements for mean P of water-stable microaggregates                | % |
| 70 | mean_P_s+c_ICPOES     | mean P in mass percent of the free silt and clay fraction                        | % |
| 71 | sd_P_s+_ICPOES        | standard deviation of mean P in mass percent of the free silt and clay fraction  | % |
| 72 | no_P_s+_ICPOES        | number of measurements for mean P of the free silt and clay fraction             | % |
| 73 | mean_Ti_bulk_ICPOES   | mean Ti in mass percent of the bulk soil                                         | % |
| 74 | sd_Ti_bulk_ICPOES     | standard deviation of mean Ti in mass percent of the bulk soil                   | % |
| 75 | no_Ti_bulk_ICPOES     | number of measurements for mean Ti of the bulk soil                              | % |
| 76 | mean_Ti_agg_ICPOES    | mean Ti in mass percent of water-stable microaggregates                          | % |
| 77 | sd_Ti_agg_ICPOES      | standard deviation of mean Ti in mass percent of water-stable microaggregates    | % |
| 78 | no_Ti_agg_ICPOES      | number of measurements for mean Ti of water-stable microaggregates               | % |
| 79 | mean_Ti_s+c_ICPOES    | mean Ti in mass percent of the free silt and clay fraction                       | % |
| 80 | sd_Ti_s+c_bulk_ICPOES | standard deviation of mean Ti in mass percent of the free silt and clay fraction | % |

|     |                       |                                                                                  |   |
|-----|-----------------------|----------------------------------------------------------------------------------|---|
| 81  | no_Ti_s+c_bulk_ICPOES | number of measurements for mean Ti of the free silt and clay fraction            | % |
| 82  | mean_Zn_bulk_ICPOES   | mean Zn in mass percent of the bulk soil                                         | % |
| 83  | sd_n_bulk_ICPOES      | standard deviation of mean Zn in mass percent of the bulk soil                   | % |
| 84  | no_Zn_bulk_ICPOES     | number of measurements for mean Zn of the bulk soil                              | % |
| 85  | mean_Zn_agg_ICPOES    | mean Zn in mass percent of water-stable microaggregates                          | % |
| 86  | sd_Zn_agg_ICPOES      | standard deviation of mean Zn in mass percent of water-stable microaggregates    | % |
| 87  | no_Zn_agg_ICPOES      | number of measurements for mean Zn of water-stable microaggregates               | % |
| 88  | mean_Zn_s+c_ICPOES    | mean Zn in mass percent of the free silt and clay fraction                       | % |
| 89  | sd_Zn_s+c_ICPOES      | standard deviation of mean Zn in mass percent of the free silt and clay fraction | % |
| 90  | no_Zn_s+c_ICPOES      | number of measurements for mean Zn of the free silt and clay fraction            | % |
| 91  | mean_Al_bulk_ICPOES   | mean Al in mass percent of the bulk soil                                         | % |
| 92  | sd_Al_bulk_ICPOES     | standard deviation of mean Al in mass percent of the bulk soil                   | % |
| 93  | no_Al_bulk_ICPOES     | number of measurements for mean Al of the bulk soil                              | % |
| 94  | mean_Al_agg_ICPOES    | mean Al in mass percent of water-stable microaggregates                          | % |
| 95  | sd_Al_agg_ICPOES      | standard deviation of mean Al in mass percent of water-stable microaggregates    | % |
| 96  | no_Al_agg_ICPOES      | number of measurements for mean Al of water-stable microaggregates               | % |
| 97  | mean_Al_s+c_ICPOES    | mean Al in mass percent of the free silt and clay fraction                       | % |
| 98  | sd_Al_s+c_ICPOES      | standard deviation of mean Al in mass percent of the free silt and clay fraction | % |
| 99  | no_Al_s+c_ICPOES      | number of measurements for mean Al of the free silt and clay fraction            | % |
| 100 | mean_Fe_bulk_ICPOES   | mean Fe in mass percent of the bulk soil                                         | % |
| 101 | sd_Fe_bulk_ICPOES     | standard deviation of mean Fe in mass percent of the bulk soil                   | % |
| 102 | no_Fe_bulk_ICPOES     | number of measurements for mean Fe of the bulk soil                              | % |
| 103 | mean_Fe_agg_ICPOES    | mean Fe in mass percent of water-stable microaggregates                          | % |
| 104 | sd_Fe_agg_ICPOES      | standard deviation of mean Fe in mass percent of water-stable microaggregates    | % |
| 105 | no_Fe_agg_ICPOES      | number of measurements for mean Fe of water-stable microaggregates               | % |
| 106 | mean_Fe_s+c_ICPOES    | mean Fe in mass percent of the free silt and clay fraction                       | % |
| 107 | sd_Fe_s+c_ICPOES      | standard deviation of mean Fe in mass percent of the free silt and clay fraction | % |
| 108 | no_Fe_s+c_ICPOES      | number of measurements for mean Fe of the free silt and clay fraction            | % |
| 109 | mean_Mn_bulk_ICPOES   | mean Mn in mass percent of the bulk soil                                         | % |
| 110 | sd_Mn_bulk_ICPOES     | standard deviation of mean Mn in mass percent of bulk soil                       | % |
| 111 | no_Mn_bulk_ICPOES     | number of measurements for mean Mn of the bulk soil                              | % |

|     |                    |                                                                                  |   |
|-----|--------------------|----------------------------------------------------------------------------------|---|
| 112 | mean_Mn_agg_ICPOES | mean Mn in mass percent of water-stable microaggregates                          | % |
| 113 | sd_Mn_agg_ICPOES   | standard deviation of mean Mn in mass percent of water-stable microaggregates    | % |
| 114 | no_Mn_agg_ICPOES   | number of measurements for mean Mn of water-stable microaggregates               | % |
| 115 | mean_Mn_s+c_ICPOES | mean Mn in mass percent of the free silt and clay fraction                       | % |
| 116 | sd_Mn_s+c_ICPOES   | standard deviation of mean Mn in mass percent of the free silt and clay fraction | % |
| 117 | no_Mn_s+c_ICPOES   | number of measurements for mean Mn of the free silt and clay fraction            | % |
| 118 | Na_XRF             | mass percent of Na in the bulk soil measured by XRF                              | % |
| 119 | Mg_XRF             | mass percent of Mg in the bulk soil                                              | % |
| 120 | Al_XRF             | mass percent of Al in the bulk soil                                              | % |
| 121 | Si_XRF             | mass percent of Si in the bulk soil                                              | % |
| 122 | P_XRF              | mass percent of P in the bulk soil                                               | % |
| 123 | S_XRF              | mass percent of S in the bulk soil                                               | % |
| 124 | Cl_XRF             | mass percent of Cl in the bulk soil                                              | % |
| 125 | K_XRF              | mass percent of K in the bulk soil                                               | % |
| 126 | Ca_XRF             | mass percent of Ca in the bulk soil                                              | % |
| 127 | Sc_XRF             | mass percent of Sc in the bulk soil                                              | % |
| 128 | Ti_XRF             | mass percent of Ti in the bulk soil                                              | % |
| 129 | Cr_XRF             | mass percent of Cr in the bulk soil                                              | % |
| 130 | Mn_XRF             | mass percent of Mn in the bulk soil                                              | % |
| 131 | Fe_XRF             | mass percent of Fe in the bulk soil                                              | % |
| 132 | Co_XRF             | mass percent of Co in the bulk soil                                              | % |
| 133 | Ni_XRF             | mass percent of Ni in the bulk soil                                              | % |
| 134 | Cu_XRF             | mass percent of Cu in the bulk soil                                              | % |
| 135 | Zn_XRF             | mass percent of Zn in the bulk soil                                              | % |
| 136 | As_XRF             | mass percent of As in the bulk soil                                              | % |
| 137 | Se_XRF             | mass percent of Se in the bulk soil                                              | % |
| 138 | Br_XRF             | mass percent of Br in the bulk soil                                              | % |
| 139 | Rb_XRF             | mass percent of Rb in the bulk soil                                              | % |
| 140 | Sr_XRF             | mass percent of Sr in the bulk soil                                              | % |
| 141 | Y_XRF              | mass percent of Y in the bulk soil                                               | % |
| 142 | Zr_XRF             | mass percent of Zr in the bulk soil                                              | % |
| 143 | Mo_XRF             | mass percent of Mo in the bulk soil                                              | % |
| 144 | Ag_XRF             | mass percent of Ag in the bulk soil                                              | % |
| 145 | Cd_XRF             | mass percent of Cd in the bulk soil                                              | % |
| 146 | In_XRF             | mass percent of In in the bulk soil                                              | % |
| 147 | Sn_XRF             | mass percent of Sn in the bulk soil                                              | % |
| 148 | Sb_XRF             | mass percent of Sb in the bulk soil                                              | % |
| 149 | Te_XRF             | mass percent of Te in the bulk soil                                              | % |

|     |                     |                                                                                                                |   |
|-----|---------------------|----------------------------------------------------------------------------------------------------------------|---|
| 150 | I_XRF               | mass percent of I in the bulk soil                                                                             | % |
| 151 | Cs_XRF              | mass percent of Cs in the bulk soil                                                                            | % |
| 152 | Ba_XRF              | mass percent of Ba in the bulk soil                                                                            | % |
| 153 | La_XRF              | mass percent of La in the bulk soil                                                                            | % |
| 154 | Ce_XRF              | mass percent of Ce in the bulk soil                                                                            | % |
| 155 | Pr_XRF              | mass percent of Pr in the bulk soil                                                                            | % |
| 156 | Nd_XRF              | mass percent of Nd in the bulk soil                                                                            | % |
| 157 | Hf_XRF              | mass percent of Hf in the bulk soil                                                                            | % |
| 158 | Ta_XRF              | mass percent of Ta in the bulk soil                                                                            | % |
| 159 | W_XRF               | mass percent of W in the bulk soil                                                                             | % |
| 160 | Au_XRF              | mass percent of Au in the bulk soil                                                                            | % |
| 161 | Hg_XRF              | mass percent of Hg in the bulk soil                                                                            | % |
| 162 | Tl_XRF              | mass percent of Tl in the bulk soil                                                                            | % |
| 163 | Pb_XRF              | mass percent of Pb in the bulk soil                                                                            | % |
| 164 | Bi_XRF              | mass percent of Bi in the bulk soil                                                                            | % |
| 165 | Th_XRF              | mass percent of Th in the bulk soil                                                                            | % |
| 166 | U_XRF               | mass percent of U in the bulk soil                                                                             | % |
| 167 | mean_Al_py_extract  | mean mass percent of sodium-pyrophosphate extractable Al in mass percent of the bulk soil                      | % |
| 168 | sd_Al_py_extract    | standard deviation of mean mass percent of sodium-pyrophosphate extractable Al of the bulk soil                | % |
| 169 | no_Al_py_extract    | number of measurements for mean mass percent of sodium-pyrophosphate extractable Al of the bulk soil           | % |
| 170 | mean_Al_ox_extract  | mean mass percent of ammonium oxalate-oxalic acid extractable Al in mass percent of the bulk soil              | % |
| 171 | sd_Al_ox_extract    | standard deviation of mean mass percent of ammonium oxalate-oxalic acid extractable Al of the bulk soil        | % |
| 172 | no_Al_ox_extract    | number of measurements for mean mass percent of ammonium oxalate-oxalic acid extractable Al                    | % |
| 173 | mean_Al_dcb_extract | mean mass percent of dithionite-citrate-bicarbonate extractable Al in mass percent of the bulk soil            | % |
| 174 | sd_Al_dcb_extract   | standard deviation of mean mass percent of dithionite-citrate-bicarbonate extractable Al of the bulk soil      | % |
| 175 | no_Al_dcb_extract   | number of measurements for mean mass percent of dithionite-citrate-bicarbonate extractable Al of the bulk soil | % |
| 176 | mean_Fe_py_extract  | mean mass percent of sodium-pyrophosphate extractable Fe in mass percent of the bulk soil                      | % |
| 177 | sd_Fe_py_extract    | standard deviation of mean mass percent of sodium-pyrophosphate extractable Fe of the bulk soil                | % |
| 178 | no_Fe_py_extract    | number of measurements for mean mass percent of sodium-pyrophosphate extractable Fe of the bulk soil           | % |
| 179 | mean_Fe_ox_extract  | mean mass percent of ammonium oxalate-oxalic acid extractable Fe in mass percent of the bulk soil              | % |
| 180 | sd_Fe_ox_extract    | standard deviation of mean mass percent of ammonium oxalate-oxalic acid extractable Fe of the bulk soil        | % |

|     |                     |                                                                                                                |   |
|-----|---------------------|----------------------------------------------------------------------------------------------------------------|---|
| 181 | no_Fe_ox_extract    | number of measurements for mean mass percent of ammonium oxalate-oxalic acid extractable Fe of the bulk soil   | % |
| 182 | mean_Fe_dcb_extract | mean mass percent of dithionite-citrate-bicarbonate extractable Fe in mass percent of the bulk soil            | % |
| 183 | sd_Fe_dcb_extract   | standard deviation of mean mass percent of dithionite-citrate-bicarbonate extractable Fe of the bulk soil      | % |
| 184 | no_Fe_dcb_extract   | number of measurements for mean mass percent of dithionite-citrate-bicarbonate extractable Fe of the bulk soil | % |
| 185 | mean_Mn_py_extract  | mean mass percent of sodium-pyrophosphate extractable Mn in mass percent of the bulk soil                      | % |
| 186 | sd_Mn_py_extract    | standard deviation of mean mass percent of sodium-pyrophosphate extractable Mn of the bulk soil                | % |
| 187 | no_Mn_py_extract    | number of measurements for mean mass percent of sodium-pyrophosphate extractable Mn of the bulk soil           | % |
| 188 | mean_Mn_ox_extract  | mean mass percent of ammonium oxalate-oxalic acid extractable Mn in mass percent of the bulk soil              | % |
| 189 | sd_Mn_ox_extract    | standard deviation of mean mass percent of ammonium oxalate-oxalic acid extractable Mn of the bulk soil        | % |
| 190 | no_Mn_ox_extract    | number of measurements for mean mass percent of ammonium oxalate-oxalic acid extractable Mn of the bulk soil   | % |
| 191 | mean_Mn_dcb_extract | mean mass percent of dithionite-citrate-bicarbonate extractable Mn in mass percent of the bulk soil            | % |
| 192 | sd_Mn_dcb_extract   | standard deviation of mean mass percent of dithionite-citrate-bicarbonate extractable Mn of the bulk soil      | % |
| 193 | no_Mn_dcb_extract   | number of measurements for mean mass percent of dithionite-citrate-bicarbonate extractable Mn of the bulk soil | % |

## Methods

*Particle size analyses for soil texture [Variable 2 to 4]:* Soil texture was analysed using the Bouyoucos hydrometer method (Bouyoucos 1962) and modified following Beretta et al. (2014). Briefly, 50 g of 2 mm sieved bulk soil were dispersed with a 10 % sodium hexametaphosphate ( $\text{NaPO}_3$ )<sub>6</sub> solution and freed of organic carbon by applying 6 % hydrogen peroxide  $\text{H}_2\text{O}_2$  three times at 60 °C. After mixing the soil suspension and transferring it into a glass column, hydrometer readings on the density of the suspension at a certain depth of the column are taken after 40 seconds and 2 hours to distinguish between silt and clay fraction. These readings were based on Stokes law that describes the rate of sedimentation as a function of particle diameter. The sand fraction was assessed by wet sieving.

*Bulk density (BD) [Variable 5]:* Soil bulk density (BD) was assessed using depth-explicit samples with a Kopecky cylinder of known volume (98.13 cm<sup>3</sup>) or derived from the known volume and weight of the soils sampled using percussion drilling and closed tube samples. Before bulk density measurements were conducted, all samples were oven-dried at 105 °C for 24 hours and weighed subsequently. Stone content was neglectable for all investigated soil samples. BD of the L and O horizons were assessed by sampling litter and organic soil layers at nine points along the border and in the centre of each forest plot. At each sampling point the thickness of the litter layer was measured with a ruler and then sampled within a 5 cm x 5 cm square. When the litter layer was too thin, the sampling square was expanded to 10 cm x 10 cm to retrieve enough sample material. The nine samples of each layer were combined to one composite sample representing a 40 x 40 m forest plot. Collected composite samples

were then oven dried at 40 °C for 48 hours and subsequently weighted. The volume of each layer was calculated using the averaged thickness of each layer multiplied by the square area of all nine sampling points. The bulk density of each layer was then calculated by dividing the dry weight of the composite sample by its volume. Note that due to Covid-19 lockdown measures in 2020 we were not able to sample the bulk density of the L and O horizons of the felsic forest plots. Instead, we used average values of the L and O horizons at the according slope positions of the mafic and mixed sedimentary rock regions as a replacement.

*Water holding capacity [Variable 6]:* Water holding capacity (WHC) was assessed in triplicates for samples that were selected later on for laboratory incubation following standard procedures of the American Society for Testing Materials (ASTM 2003). Briefly, 10 g of 12 mm sieved soil that was placed in a Haines Funnel (Ø 8 cm) on top of Whatman Grade 42, ashless filter paper. Then, samples were saturated with distilled water and left to drain for approximately 30 minutes. Wet filters as well as dry and wet samples were weighed and the WHC was derived by the weight difference of the dry versus the wet, saturated soil (after subtracting the filter weight).

*pH value [variable 7]:* Soil pH values were determined following the protocol by Black (1965) potentiometrically with a glass electrode using a portable multiparameter Meter HI9828 (Hanna Instruments US Inc., USA) on 20 g of 2 mm sieved bulk soil sample material. Prior to measurements the bulk soil material was stirred for 10 minutes and followed by response time of 30 min in a 1:2.5 soil (weight) / solution (volume) ratio in a 1 M potassium chloride (KCl) solution.

*Plant available P [variable 8 of the Data structure table]:* The amount of plant available P was measured on 2 mm sieved bulk soil using the Bray 2 method (Okalebo et. a. 2002). 50 ml of a 0.03 N  $\text{NH}_4\text{F}$  and 0.1 M HCl solution were added to 2.5 g of bulk soil. After shaking for 5 minutes, the extract is filtered and analysed on a spectrophotometer where the amount of P in solution is determined colorimetrically by measuring the intensity of signal turbation at 880 nm when the filtrate is treated with a molybdate-ascorbic acid reagent.

*CEC, ECEC, base saturation and exchangeable acidity [variables 9 to 18]:* Potential cation exchange capacity (CEC) was analysed on 2 mm sieved bulk soil by percolation with  $\text{BaCl}_2$  at pH 8.1, whereas the effective cation exchange capacity (ECEC) was measured via  $\text{NH}_4\text{Cl}$  percolation at soil pH. The percolate was analysed for exchangeable bases via flame photometry and atomic absorption spectrophotometry (Pauwels et. al. 1992). Exchangeable acidity (i.e. exchangeable  $\text{Al}^{3+}$  and  $\text{H}^+$ ) and the total percent base saturation (BS), defined as the relative availability of all base cations (i.e. the sum of all base cations Na, K, Mg, Ca) for CEC, was calculated in percent of ECEC.

*Soil fractionation [variables 19 to 117]:* A subsample of 80 g was fractionated for each soil and depth layer to derive functional C fractions. This procedure was based on a conceptual C fraction model method proposed by Steward et al. (2008) and was modified according to Doetterl et al. (2015). The scheme consists of a series of physical fractionation techniques applied in order to isolate C fractions, differentiated based on different stabilization mechanisms (chemical, biochemical, and physical). These different fractions can also be associated with different turnover times and varying C stability. Using a microaggregate isolator, C was fractionated into coarse particulate organic matter C (CPOM, > 250  $\mu\text{m}$ ), water-stable microaggregate associated C (mAgg 250 – 53  $\mu\text{m}$ ), and non-aggregated silt and clay C (s+c, < 53  $\mu\text{m}$ ). Note that that the variability of this procedure was determined by executing about 20 % of all measurements in triplicates. For a scientific interpretation of the results of this fractionation scheme see Reichenbach et al. (2021).



*Total element composition in different soil based on ICP-OES measurements [variables 19 to 117]:* Total elemental composition was determined using inductively coupled plasma optical emission spectrometry (ICP-OES) (5100 ICP-OES Agilent Technologies, USA) for the determination of calcium (Ca), magnesium (Mg), sodium (Na), potassium (K), phosphorous (P), aluminium (Al), iron (Fe) and manganese (Mn). The analysis was performed on bulk soil and physically separated mineral fractions of soil. For soil and rock samples, 1 g of powdered sample material was placed in a digestion tube and was boiled for 90 minutes at 120 °C in aqua regia (2 ml bi-distilled water, 2 ml 70 % nitric acid (HNO<sub>3</sub>), 6 ml 37 % hydrochloric acid (HCl)) using a DigiPREP digestion system (DigiPREP MS SCP Science, Canada). All extracts, including calibration standards, were then filtered through a 41 grade Whatman filter and diluted with a dilution ratio of 1:2 for Ca, Mg, Na, K, P, and 1:1000 for Al, Fe, Mn using a diluting system (Hamilton 100, USA) before ICP-OES measurements. For plant samples, 200 mg of sample material was placed in digestion tubes and boiled for 90 minutes at 120 °C in a mix of 15 ml of 65 % HNO<sub>3</sub> and heated using a DigiPREP digestion system (DigiPREP MS SCP Science, Canada). After 30 minutes of cooling, 3 ml of 30 % hydrogen peroxide (H<sub>2</sub>O<sub>2</sub>) were added to the plant sample mix and this was again heated for another 90 minutes at 120 °C. All extracts, including calibration standards, were then transferred into 50 ml PE-Tubes, filtered through a 41 grade Whatman filter and digestion tubes rinsed three times bi-distilled water to remove potential residues before measurement of the extract.

*Total element composition based on XRF measurements [variables 118 to 166]:* Total elemental composition of the bulk soil and rock samples of the parent material were conducted using X-ray fluorescence (XRF) for Silica (Si), Titanium (Ti) and Zirkonium (Zr) following the procedure of Karathanasis and Hajek (1996). 4 g of powdered sample material and 1 g of CEROX wax were mixed for approximately 2 minutes using a vibrating mill (Mixer Mill MM 200 Retsch, Germany) before producing a pellet by applying pressure of 25 tons per cm<sup>2</sup> on the samples using a manual hydraulic press (Specac, USA). The stable and mixed pellet is then subsequently analysed using a XEPOS SEP03 XRF (Spectro Analytical Instruments GmbH, Germany).

*Sequential extraction of pedogenic oxides [variables 167 to 193]:* A three-step sequential extraction scheme of Fe, Al, and Mn bearing pedogenic organo-mineral associations and oxy-hydroxides (Stucki et al., 1988) was carried out in the following order: 1. extraction with sodium-pyrophosphate at pH 10 following a procedure by Bascomb (1968), 2. extraction with ammonium oxalate-oxalic acid at pH 3 following a procedure by Dahlgren (1994), and 3. extraction with dithionite-citrate-bicarbonate (DCB) at pH 8 following a procedure by Mehra and Jackson (1960). This allows for the assessment of the amount of Mn, Fe and Al-bearing phases in the different fractions and their correlation with organic C in the different SOC fractions. The specific extraction was performed on bulk soil of samples that were selected for fractionation and incubation (see Bukombe et al. 2021, Reichenbach et al. 2021). All extracts, including calibration standards, were filtered through a 41 grade Whatman filter and diluted (1:1000) and then analysed on the ICP-OES (5100 ICP-OES Agilent Technologies, USA). In our sequential extraction, pyrophosphate (py) extractable components are interpreted as predominantly organically complexed metals. Oxalate (ox) extractable components reflect the amorphous secondary Fe and Mn oxides and poorly crystalline aluminosilicates (imogolite-type materials, ITM). Dithionite (dcb) extractable components included predominantly crystalline oxy-hydroxides of Mn, Mg, Fe and Al. Several authors have shown that pyrophosphate extractable Al may not be attributable only to Al bound to organo-metallic complexes since the alkaline extractant could also extract Al from Al hydroxide phases and from poorly crystalline aluminosilicates (i.e. Schuppli et al., 1983; Kaiser and Zech, 1996). Therefore, results of the pyrophosphate extraction must be treated with caution due to

uncertainty on the origin of the extracted minerals. Hence, we limit our analysis to interpreting the abundance and spatial patterns of the various extractable components in the bulk soil and discuss the pedological implications of the observed carbon/mineral correlations. For a scientific interpretation of these results see Reichenbach et al. (2021).

### **Acknowledgment**

TropSOC was funded via the Emmy-Noether-Program of the German Research Foundation (project ID 387472333).

### **References**

- American Society for Testing Materials - ASTM. ASTM-D 5298-03. Standard test method for measurement of soil potential (suction) using filter paper. West Conshohocken, PA, 2003.
- Bascomb, C. L.: Distribution of pyrophosphate-extractable iron and organic carbon in soils of various groups, *J. Soil Sci.*, 19, 251–268, <https://doi.org/10.1111/j.1365-2389.1968.tb01538.x>, 1968.
- Beretta, A. N., Silbermann, A. V., Paladino, L., Torres, D., Bassahun, D., Mussell, R., and Garcíá-Lamohte, A.: Soil texture analysis using a hydrometer: modification of the Bouyoucos method, *Cien. Inv. Agr.*, 42, 263-271, 10.4067/S0718-16202014000200013, 2014.
- Black, C. A.: Method of soil analysis, part 2, chemical and microbiological properties, American Society of Agronomy, Madison, Wisconsin USA, 1965.
- Bouyoucos, G. J.: Hydrometer method improved for making particle size analyses of soils, *Agronomy Journal*, 54, 464-465, 10.2134/agronj1962.00021962005400050028x, 1962.
- Bukombe, B., Fiener, P., Hoyt, A., Doetterl, S.: Controls on heterotrophic respiration and radiocarbon signature in geochemically distinct African tropical forest soils, *SOIL DISCUSSIONS* (in review)., 2021.
- Dahlgren, R. A.: Quantification of allophane and imogolite, quantitative methods in soil mineralogy, edited by: Chairs, J. E., and Stucki, J. W., Soil Science Society of America, Madison, Wisconsin, USA, 430-451, 1944.
- Doetterl, S., Stevens, A., Six, J., Merckx, R., van Oost, K., Pinto, M. C., Casanova-Katny, A., Muñoz, C., Boudin, M., Zagal Venegas, E., and Boeckx, P.: Soil carbon storage controlled by interactions between geochemistry and climate, *Nat. Geosci.*, 8, 780–783, <https://doi.org/10.1038/ngeo2516>, 2015. <https://doi.org/10.2136/sssabookser5.3.c7>, 1996.
- Kaiser, K., and Zech, W.: Defects in estimation of aluminium in humus complexes of podzolic soils by pyrophosphate extraction, *Soil Sci.*, 161, 452–458, <https://doi.org/10.1097/00010694-199607000-00005>, 1996.
- Karathanasis, A. D., and Hajek, B. F.: Elemental analysis by X-ray fluorescence spectroscopy, in: *Methods of Soil Analysis: Part 3 Chemical Methods*, edited by: Sparks, D. L., Page, A. L., Helmke, P. A., Loeppert, R. H., Soltanpour, P. N., Tabatabai, M. A., Johnston, C. T., and Sumner, M. E., Soil Science Society of America and American Society of Agronomy, Madison, USA, 161-224, 1996.
- Mehra, O. P., and Jackson, M. L.: Iron oxide removal from soils and clays by a dithionite-citrate system buffered with sodium bicarbonate, *Clays and Clay Minerals*, 7, 317–327, <https://doi.org/10.1346/CCMN.1958.0070122>, 1960.
- Okalebo, J. R., Gathua, K. W., and Woomer, P. L.: Laboratory methods of soil and plant analysis: a working manual. Second Edition, Nairobi, Kenya, 131 pp., 2002.
- Pauwels, J. M., van Ranst, E., and Verloo, M.: Manuel de laboratoire de pédologie: méthodes d'analyse de sols et de plantes, équipement, gestion de stocks de verrerie et de produits chimiques, Yaoundé: Centre universitaire de Dschang, Department des sciences du sol, 1992.

- Reichenbach, M., Fiener P., Garland, G., Griepentrog, M., Six, S., and Doetterl, S.: The role of geochemistry in organic carbon stabilization in tropical rainforest soils, SOIL DISCUSSIONS (in review)., 2021.
- Schuppli, P. A., Ross, G. J., and McKeague, J. A.: The effective removal of suspended materials from pyrophosphate extracts of soils from tropical and temperate regions, Soil Science Society of America Journal, 47, 1026–1032, <https://doi.org/10.2136/sssaj1983.03615995004700050037x>, 1983.
- Stewart, C. E., Plante, A. F., Paustian, K., Conant, R. T., and Six, J.: Soil carbon saturation: linking concept and measurable carbon pools, Soil Biol. Biochem., 72, 379–392, <https://doi.org/10.2136/sssaj2007.0104>, 2008.
- Stucki, J. W., Goodman, B. A., and Schwertmann, U.: Iron in soils and clay minerals, Springer, Dordrecht, Netherlands, 894 pp., 1988.
