# Supplementary material for: Organic matter cycling along geochemical, geomorphic and disturbance gradients in forests and cropland of the African Tropics – Project TropSOC Database Version 1.0
Source: Copernicus journal article supplement (doi:10.5194/essd-2021-73), 2021-04-23
Supplement: Supplementary file 38 [file 410_meteo_locations.pdf › TropSOC_DATABASE_v1.0/4_meteo/410_meteo_locations.pdf]

## Organic matter cycling along geochemical, geomorphic and disturbance gradients in vegetation and soils of African tropical forests and cropland - Project TropSOC DATABASE\_v1.0

### 4.1. Meteorological data – Locations of meteorological stations

When using these data, please cite the original publication:

Doetterl S., Asifiwe R.K., Baert G., Bamba F., Bauters M., Boeckx P., Bukombe B., Cadisch G., Cizungu L.N., Cooper M., Hoyt A., Kabaseke C., Kalbitz K., Kidinda L., Maier A., Mainka M., Mayrock J., Muhindo D., Mujinya B.B., Mukotanyi, S.M., Nabahungu L., Reichenbach M., Rewald B., Six J., Stegmann A., Summerauer L., Unseld R., Vanlauwe B., Van Oost K., Verheyen K. Vogel C., Wilken F., Fiener P. Organic matter cycling along geochemical, geomorphic and disturbance gradients in forests and cropland of the African Tropics - Project TropSOC Database Version 1.0. *Earth System Science Data* XXX, DOI XXX, 2021.

#### **Introduction:**

The dataset comprises a unique identifier for each meteorological station followed by 6 variables that provide information regarding names, locations, elevation, instruments and number of parameters measured at each station.

#### **Data structure**

| No. | Variable     | Explanation                                      | Unit |
|-----|--------------|--------------------------------------------------|------|
| 1   | stationID    | identification number of meteorological stations | -    |
| 2   | station_name | station name as used in TropSOC project          | -    |
| 3   | lat_deg      | latitude in decimal degree                       | °    |
| 4   | long_deg     | longitude in decimal degree                      | °    |
| 5   | elev_m       | elevation above sea level                        | m    |
| 6   | device_type  | brand and name of the measuring device           | -    |
| 7   | no_param     | number of parameters recorded by device          | -    |

#### **Acknowledgment**

TropSOC was funded via the Emmy-Noether-Program of the German Research Foundation (project ID 387472333).
